# Supplementary material for: Emission-dominated gas exchange of elemental mercury vapor over naturalsurfaces in China
Source: Copernicus journal article supplement (doi:10.5194/acp-16-11125-2016), 2016-09-08
Supplement: Supplementary file 1 [file acp-16-11125-2016-supplement.pdf]

Supplement of Atmos. Chem. Phys., 16, 11125–11143, 2016  
<http://www.atmos-chem-phys.net/16/11125/2016/>  
doi:10.5194/acp-16-11125-2016-supplement  
© Author(s) 2016. CC Attribution 3.0 License.

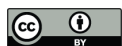

Atmospheric  
Chemistry  
and Physics  
Open Access  
EGU

*Supplement of*

## **Emission-dominated gas exchange of elemental mercury vapor over natural surfaces in China**

**Xun Wang et al.**

*Correspondence to:* Xinbin Feng (fengxinbin@vip.skleg.cn) and Che-Jen Lin (jerry.lin@lamar.edu)

The copyright of individual parts of the supplement might differ from the CC-BY 3.0 licence.

16 S1 An unpublished Hg concentration dataset

17 An unpublished Hg concentration dataset was collected in China in autumn of 2013 and 2014.  
18 This dataset includes Hg concentration in litterfall collected under 5 predominant tree species in 4  
19 national subtropical evergreen forests (Xishuangbanna: 21.68 N, 101.42 E; Jianfengling: 19.18 N,  
20 109.73 E; Shenlongjia: 31.45 N, 109.91 E; Mt. Wuyi: 28.04 N, 117.57 E) and 4 national temperate  
21 forests (Jixian: 36.16 N, 110.73E; Mt. Xiaolong: 34.35 N, 106.01 E; Mt. Xiaoxinganling: 47.17 N,  
22 128.95 E; Mt. Taihang: 34.96 N, 112.4 E). The collection of litter samples, measurement of Hg  
23 concentration and the quality control procedure have been described elsewhere (Zhou et al., 2013).  
24 Briefly, litterfall samples were collected by 1 m × 1 m nylon nets (1 mm pore size) placed under  
25 canopy. Hg concentration in litter was measured by a Lumex RA-915+ multifunctional Hg analyzer  
26 equipped with a pyrolysis attachment.

27

28 S2 Monte Carlo simulation for Hg input through litterfall in China

29 Monte Carlo simulation is a modeling technique that relies on random sampling and  
30 statistical data analysis (Raychaudhuri, 2008). In this study, Monte Carlo simulation was  
31 applied to integrate the datasets of Hg concentration in litterfall and litterfall biomass to  
32 produce the probabilistic Hg flux through litterfall, and described in detail in (Wang et al.,  
33 2016). Briefly, the simulation was carried out in three steps: creating statistical distribution  
34 using the observational data, perform random sampling, and flux calculation. In the first  
35 step, Hg concentration in litters and litterfall biomass production were regarded as random  
36 variables:

37 
$$Hg_i(\theta) = f_\theta(x_1, x_2, \dots, x_n | \theta) \quad (1)$$

38 
$$Biomass_i(\beta) = f_\beta(x_1, x_2, \dots, x_n | \beta) \quad (2)$$

39 where  $\theta$  is a random variable vector for Hg concentrations in a given type of biomes  
40 group (total number of group is 14);  $\beta$  is the random variable vector for litterfall biomass  
41 production in  $i$  group ( $\text{g m}^{-2} \text{ yr}^{-1}$ ). Function  $f$  represents the associated probability density

42 function. As such,  $F_\theta$  and  $F_\beta$  represent the respective cumulative probability distribution  
43 functions.

44 After determining the respective probability density functions of the data, an inverse  
45 transformation method was utilized to generate a random sample from the probability  
46 density distribution (Raychaudhuri, 2008). For example, the random sample for Hg  
47 concentration (X) was generated using:

48 Generating:  $U \sim U(0,1)$  (3)

49 Returning:  $X = F_\theta^{-1}(U)$  (4)

50 where U is a uniform distribution and  $F_\theta^{-1}$  denotes the inverse of  $F_\theta$ . Similarly, the  
51 random sample for litterfall biomass production can be described as:

52  $X_{\beta,i} \sim F_\beta(U)^{-1}$  (5)

53 Therefore, the random variable of Hg deposition flux caused by litterfall ( $L_i$ ) can be  
54 expressed as:

55  $L_i = X_{\theta,i} X_{\beta,i}$  (6)

56 After 50,000 sampling iterations, the descriptive statistics and the 95% confidence  
57 interval (CI) of  $L_i$  were calculated from the probability distribution of  $L_i$ . The Monte Carlo  
58 simulation and Hg flux calculation was performed using MATLAB 2013a and ArcGIS 10.3.  
59 The model-estimate Hg deposition ( $M_i$ , Mg yr<sup>-1</sup>) was classified for the 14 WWF (World  
60 Wildlife Fund for Nature) biomes:

61  $M_i = \frac{L_i}{t_{d,i}} \times t_{n,i} \times \sigma$  (7)

62 Where  $L_i$  is Hg deposition flux caused by litterfall;  $\sigma$  is the ratio for unit conversion;  
63  $t_{d,i}$  is tree density (stems ha<sup>-1</sup>);  $t_{n,i}$  is total number of trees in the  $i$ th biomes type compiled  
64 from a best estimate in a recent study (Crowther et al., 2015)  
65 ([http://elischolar.library.yale.edu/yale\\_fes\\_data/1](http://elischolar.library.yale.edu/yale_fes_data/1)). The global spatial distribution of Hg  
66 deposition through litterfall was then calculated based on the spatial distribution of tree  
67 density. The quality control procedure is described in detail by Wang et al. (2016).

68 Table S1 Orthogonal Design (  $L_{25}(5^6)$ ) for WRF

69

| Run Times | MP | CU | R | PBL |
|-----------|----|----|---|-----|
| 1         | 8  | 5  | 3 | 2   |
| 2         | 8  | 1  | 4 | 1   |
| 3         | 8  | 2  | 1 | 8   |
| 4         | 8  | 3  | 5 | 7   |
| 5         | 8  | 84 | 7 | 12  |
| 6         | 6  | 5  | 4 | 8   |
| 7         | 6  | 1  | 1 | 7   |
| 8         | 6  | 2  | 5 | 12  |
| 9         | 6  | 3  | 7 | 2   |
| 10        | 6  | 84 | 3 | 1   |
| 11        | 3  | 5  | 1 | 12  |
| 12        | 3  | 1  | 5 | 2   |
| 13        | 3  | 2  | 7 | 1   |
| 14        | 3  | 3  | 3 | 8   |
| 15        | 3  | 84 | 4 | 7   |
| 16        | 4  | 5  | 5 | 1   |
| 17        | 4  | 1  | 7 | 8   |
| 18        | 4  | 2  | 3 | 7   |
| 19        | 4  | 3  | 4 | 12  |
| 20        | 4  | 84 | 1 | 2   |
| 21        | 2  | 5  | 7 | 7   |
| 22        | 2  | 1  | 3 | 12  |
| 23        | 2  | 2  | 4 | 2   |
| 24        | 2  | 3  | 1 | 1   |
| 25        | 2  | 84 | 5 | 8   |

70

71 where MP: Microphysics Options, 8 means Thompson, 6 means WSM6, 3 means WSM3,  
72 4 means WSM5, 2 means Lin scheme.

73 CU: Cumulus Parameterization Options; 1 means Kain-Fritsch; 2 means Betts-Miller-  
74 Janjic; 3 means Grell-Freitas; 5 means Grell-3; 84 means New SAS (HWRF).

75 R: Radiation Physics Options; 1 means Dudhia for ra\_sw\_physics and RRTM for  
76 ra\_lw\_physics ; 3 means CAM; 4 means RRTMG; 5 means New Goddard; 7 means  
77 FLG.

78 PBL: PBL Physics Options; 1 means YSU; 2 means MYJ; 7 means ACM2; 8 means  
79 BouLac; 12 means GBM.

80

81 Table S2 peer-reviewed air-surfaces fluxes data. W means warm season (May-October), and C  
 82 means cold season (November-April).  
 83

| Term              | Lon     | Lat     | Type | Flux (ng m <sup>-2</sup> h <sup>-1</sup> ) | Refencens             |
|-------------------|---------|---------|------|--------------------------------------------|-----------------------|
| Paddy             | 106.471 | 26.556  | W    | 27.4                                       | (Wang et al., 2004)   |
| Paddy             | 106.471 | 26.556  | C    | 5.6                                        | (Wang et al., 2004)   |
| Agricultural land | 102.115 | 29.648  | C    | -4.1                                       | (Fu et al., 2008)     |
| Agricultural land | 102.115 | 29.648  | W    | 19.2                                       | (Fu et al., 2008)     |
| Agricultural land | 102.115 | 29.648  | W    | 21.1                                       | (Fu et al., 2008)     |
| Agricultural land | 102.115 | 29.648  | C    | -3.1                                       | (Fu et al., 2008)     |
| Agricultural land | 102.088 | 29.680  | W    | 2.9                                        | (Fu et al., 2008)     |
| Agricultural land | 102.088 | 29.680  | C    | 1.5                                        | (Fu et al., 2008)     |
| Agricultural land | 102.088 | 29.680  | W    | 2.1                                        | (Fu et al., 2008)     |
| Agricultural land | 102.225 | 29.787  | W    | 132                                        | (Fu et al., 2008)     |
| Agricultural land | 102.168 | 29.607  | W    | 24.5                                       | (Fu et al., 2008)     |
| Agricultural land | 102.115 | 29.648  | W    | 20.4                                       | (Fu et al., 2008)     |
| Agricultural land | 112.47  | 23.014  | C    | 32.1                                       | (Fu et al., 2012)     |
| Grassland         | 112.852 | 22.997  | C    | 114                                        | (Fu et al., 2012)     |
| Agricultural land | 113.082 | 22.534  | C    | 23.8                                       | (Fu et al., 2012)     |
| Grassland         | 113.706 | 22.82   | C    | 75.6                                       | (Fu et al., 2012)     |
| Grassland         | 114.457 | 23.116  | C    | 24.4                                       | (Fu et al., 2012)     |
| Grassland         | 113.542 | 23.859  | C    | 44.8                                       | (Fu et al., 2012)     |
| Agricultural land | 113.569 | 24.703  | C    | 18.2                                       | (Fu et al., 2012)     |
| Agricultural land | 112.87  | 23.022  | C    | 135                                        | (Fu et al., 2012)     |
| Agricultural land | 112.422 | 23.13   | C    | 14.2                                       | (Fu et al., 2012)     |
| Agricultural land | 112.68  | 22.336  | C    | 10.7                                       | (Fu et al., 2012)     |
| Agricultural land | 112.924 | 21.874  | C    | 2.7                                        | (Fu et al., 2012)     |
| Agricultural land | 113.893 | 23.407  | C    | 1.4                                        | (Fu et al., 2012)     |
| Agricultural land | 113.639 | 24.712  | C    | 22.8                                       | (Fu et al., 2012)     |
| wheat             | 116.600 | 36.950  | W    | 61.2                                       | (Sommar et al., 2013) |
| Agricultural land | 29.921  | 106.370 | W    | 31                                         | (Zhu et al., 2011)    |
| Agricultural land | 29.921  | 106.370 | W    | 15.1                                       | (Zhu et al., 2011)    |
| Paddy             | 106.370 | 29.921  | W    | 20.6                                       | (Zhu et al., 2013)    |
| Paddy             | 106.437 | 29.757  | W    | 4.63                                       | (Zhu et al., 2013)    |
| wheat             | 116.600 | 36.950  | W    | 7.6                                        | (Zhu et al., 2015)    |
| wheat             | 116.600 | 36.950  | C    | 2.2                                        | (Zhu et al., 2015)    |
| wheat             | 116.600 | 36.950  | W    | 7.2                                        | (Zhu et al., 2015)    |
| wheat             | 116.600 | 36.950  | C    | 5.3                                        | (Zhu et al., 2015)    |
| wheat             | 116.600 | 36.950  | W    | 10.8                                       | (Zhu et al., 2015)    |
| wheat             | 116.600 | 36.950  | C    | 9.3                                        | (Zhu et al., 2015)    |

|                         |         |        |   |       |                     |
|-------------------------|---------|--------|---|-------|---------------------|
| wheat                   | 116.600 | 36.950 | W | 17.3  | (Zhu et al., 2015)  |
| Longtanzi reservoir     | 106.400 | 29.817 | W | 43.75 | (Wang et al., 2006) |
| Jialing river           | 106.433 | 29.833 | C | 6.7   | (Wang et al., 2006) |
| Hongfeng reservoir      | 106.471 | 26.556 | W | 6.5   | (Feng et al., 2008) |
| Hongfeng reservoir      | 106.471 | 26.556 | C | 5.1   | (Feng et al., 2008) |
| Hongfeng reservoir      | 106.471 | 26.556 | C | 1.8   | (Feng et al., 2008) |
| Hongfeng reservoir      | 106.471 | 26.556 | W | 4.8   | (Feng et al., 2008) |
| Hongfeng reservoir      | 106.471 | 26.556 | W | 4     | (Feng et al., 2008) |
| Hongfeng reservoir      | 106.471 | 26.556 | C | 2.8   | (Feng et al., 2008) |
| Hongfeng reservoir      | 106.471 | 26.556 | C | 2     | (Feng et al., 2008) |
| Baihua Reservoir        | 106.531 | 26.689 | C | 3     | (Feng et al., 2004) |
| Baihua Reservoir        | 106.531 | 26.689 | W | 6.39  | (Feng et al., 2004) |
| Baihua Reservoir        | 106.531 | 26.689 | W | 7.43  | (Feng et al., 2004) |
| Baihua Reservoir        | 106.531 | 26.689 | W | 6.62  | (Feng et al., 2004) |
| Wujiang reservoir       | 106.785 | 27.312 | W | 20.1  | (Fu et al., 2010)   |
| Wujiang reservoir WJD-1 | 106.785 | 27.312 | C | 6.2   | (Fu et al., 2010)   |
| Wujiang reservoir       | 106.785 | 27.312 | W | 14.1  | (Fu et al., 2010)   |
| Wujiang reservoir WJD-2 | 106.785 | 27.312 | C | 4.7   | (Fu et al., 2010)   |
| Wujiang reservoir       | 106.785 | 27.312 | W | 9.9   | (Fu et al., 2010)   |
| Wujiang reservoir WJD-3 | 106.785 | 27.312 | C | 3.2   | (Fu et al., 2010)   |
| Wujiang reservoir       | 106.769 | 27.321 | W | 4.1   | (Fu et al., 2010)   |
| Wujiang reservoir SFY-1 | 106.769 | 27.321 | C | 1     | (Fu et al., 2010)   |
| Wujiang reservoir       | 106.769 | 27.321 | W | 1.5   | (Fu et al., 2010)   |
| Wujiang reservoir SFY-2 | 106.769 | 27.321 | C | 0.6   | (Fu et al., 2010)   |
| Wujiang reservoir       | 106.769 | 27.321 | W | 4.4   | (Fu et al., 2010)   |

|                              |         |         |   |      |                     |
|------------------------------|---------|---------|---|------|---------------------|
| Wujiang reservoir<br>SFY-3   | 106.769 | 27.321  | C | 1.3  | (Fu et al., 2010)   |
| Puding reservoir             | 105.791 | 26.274  | W | 2.2  | (Fu et al., 2010)   |
| Puding reservoir             | 105.791 | 26.274  | C | 0    | (Fu et al., 2013b)  |
| Puding reservoir             | 105.791 | 26.274  | W | 4.2  | (Fu et al., 2013b)  |
| Puding reservoir             | 105.791 | 26.274  | C | 0.2  | (Fu et al., 2013b)  |
| HJD-1                        | 104.114 | 37.550  | W | 4.2  | (Fu et al., 2013b)  |
| HJD-3                        | 104.114 | 37.550  | W | 4.2  | (Fu et al., 2013b)  |
| HJD-1                        | 104.114 | 37.550  | C | 3.1  | (Fu et al., 2013a)  |
| HJD-2                        | 104.114 | 37.550  | C | 2.7  | (Fu et al., 2013a)  |
| HJD-3                        | 104.114 | 37.550  | C | 2.1  | (Fu et al., 2013a)  |
| YZD-1                        | 105.792 | 26.648  | W | 4    | (Fu et al., 2013a)  |
| YZD-2                        | 105.792 | 26.648  | W | 3.9  | (Fu et al., 2013a)  |
| YZD-3                        | 105.792 | 26.648  | W | 4    | (Fu et al., 2013a)  |
| YZD-1                        | 105.792 | 26.648  | C | 0.1  | (Fu et al., 2013a)  |
| YZD-2                        | 105.792 | 26.648  | C | 0.4  | (Fu et al., 2013a)  |
| YZD-3                        | 105.792 | 26.648  | C | 1    | (Fu et al., 2013a)  |
| DF Reservoir                 | 106.180 | 26.859  | W | 3.6  | (Fu et al., 2013a)  |
| DF Reservoir                 | 106.180 | 26.859  | W | 4.3  | (Fu et al., 2013a)  |
| DF Reservoir                 | 106.180 | 26.859  | W | 3.3  | (Fu et al., 2013a)  |
| DF Reservoir                 | 106.180 | 26.859  | C | 0.7  | (Fu et al., 2013a)  |
| DF Reservoir                 | 106.180 | 26.859  | C | 0.9  | (Fu et al., 2013a)  |
| SFY Reservoir                | 106.769 | 27.321  | C | 3.7  | (Fu et al., 2013a)  |
| SFY Reservoir                | 106.769 | 27.321  | C | 2.3  | (Fu et al., 2013a)  |
| SFY Reservoir                | 106.769 | 27.321  | W | 4.3  | (Fu et al., 2013a)  |
| SFY Reservoir                | 106.769 | 27.321  | C | 1.3  | (Fu et al., 2013a)  |
| SFY Reservoir                | 106.769 | 27.321  | C | 1.2  | (Fu et al., 2013a)  |
| SFY Reservoir                | 106.769 | 27.321  | C | 1.3  | (Fu et al., 2013a)  |
| East China sea<br>shore soil | 121.898 | 31.054  | C | 3.2  | Zhu et al., 2013AEa |
| East China sea<br>shore soil | 121.898 | 31.054  | C | -1.4 | Zhu et al., 2013AEa |
| Subtropical forest<br>soil   | 23.178  | 112.544 | C | 6.6  | (Fu et al., 2012)   |
| Subtropical forest<br>soil   | 102.020 | 29.703  | W | 6.6  | (Fu et al., 2008)   |
| Subtropical forest<br>soil   | 102.143 | 29.420  | W | 5.7  | (Fu et al., 2008)   |
| Subtropical forest<br>soil   | 102.111 | 29.628  | W | 9.3  | (Fu et al., 2008)   |

|                         |          |        |   |       |                     |
|-------------------------|----------|--------|---|-------|---------------------|
| Subtropical forest soil | 102.063  | 29.603 | W | 7.7   | (Fu et al., 2008)   |
| Subtropical forest soil | 102.030  | 29.588 | W | 0.5   | (Fu et al., 2008)   |
| Subtropical forest soil | 101.930  | 29.583 | W | 2.9   | (Fu et al., 2008)   |
| Subtropical forest soil | 106.656  | 29.609 | C | 0.3   | (Du et al., 2014)   |
| Subtropical forest soil | 106.283  | 29.833 | W | 14.2  | (Ma et al., 2013)   |
| Subtropical forest soil | 106.283  | 29.833 | W | 20.7  | (Ma et al., 2013)   |
| Simianshan forest soil  | 106.4333 | 28.583 | W | 7.7   | (Wang et al., 2006) |
| Geleshan forest soil    | 106.417  | 29.567 | W | 3.4   | (Wang et al., 2006) |
| Jinyunshan forest soil  | 106.367  | 29.933 | W | 8.4   | (Wang et al., 2006) |
| Changbai forest         | 128.112  | 42.402 | W | 2.7   | (Fu et al., 2015)   |
| Forest soil             | 125.299  | 43.850 | W | 7.6   | (Fang et al., 2003) |
| Forest soil             | 125.467  | 43.780 | W | 5.6   | (Fang et al., 2003) |
| Forest soil             | 125.467  | 43.780 | W | 3.3   | (Fang et al., 2003) |
| Grassland               | 102.115  | 29.648 | C | -18.7 | (Fu et al., 2008)   |
| Grassland               | 102.115  | 29.648 | C | 3.1   | (Fu et al., 2008)   |
| Grassland               | 102.115  | 29.648 | W | 13.4  | (Fu et al., 2008)   |
| Grassland               | 102.115  | 29.648 | W | 12.3  | (Fu et al., 2008)   |
| Grassland               | 102.115  | 29.648 | W | -1.7  | (Fu et al., 2008)   |
| Grassland               | 106.731  | 26.512 | W | 58.9  | (Feng et al., 2005) |
| Grassland               | 106.734  | 26.576 | W | 15.4  | (Feng et al., 2005) |
| Grassland               | 106.798  | 26.533 | W | 7.9   | (Feng et al., 2005) |
| Grassland               | 106.798  | 26.533 | C | 2.4   | (Feng et al., 2005) |
| Grassland               | 106.798  | 26.533 | W | 12.2  | (Feng et al., 2005) |



85

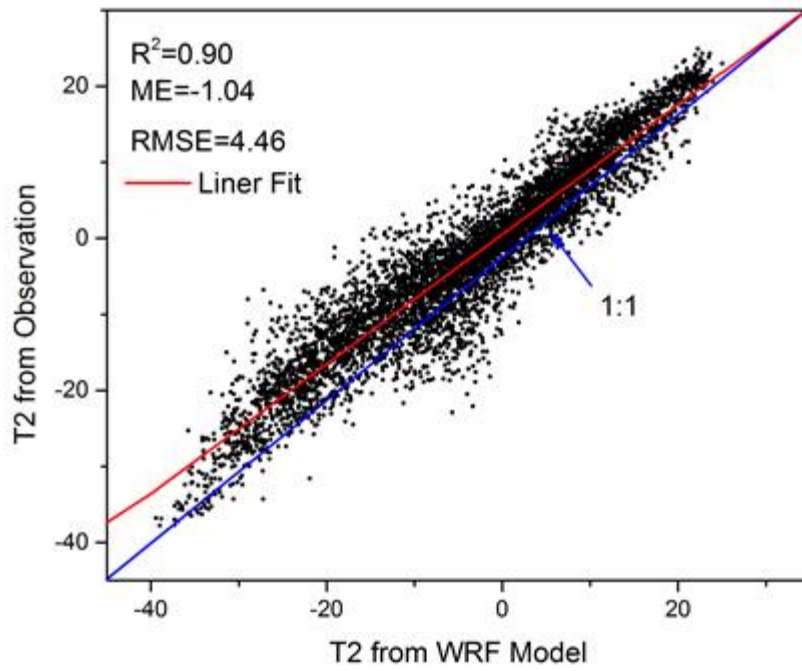

86

87 Figure S1 The simulated T2 (air temperature above 2 m) by WRF .vs the observed T2.

88

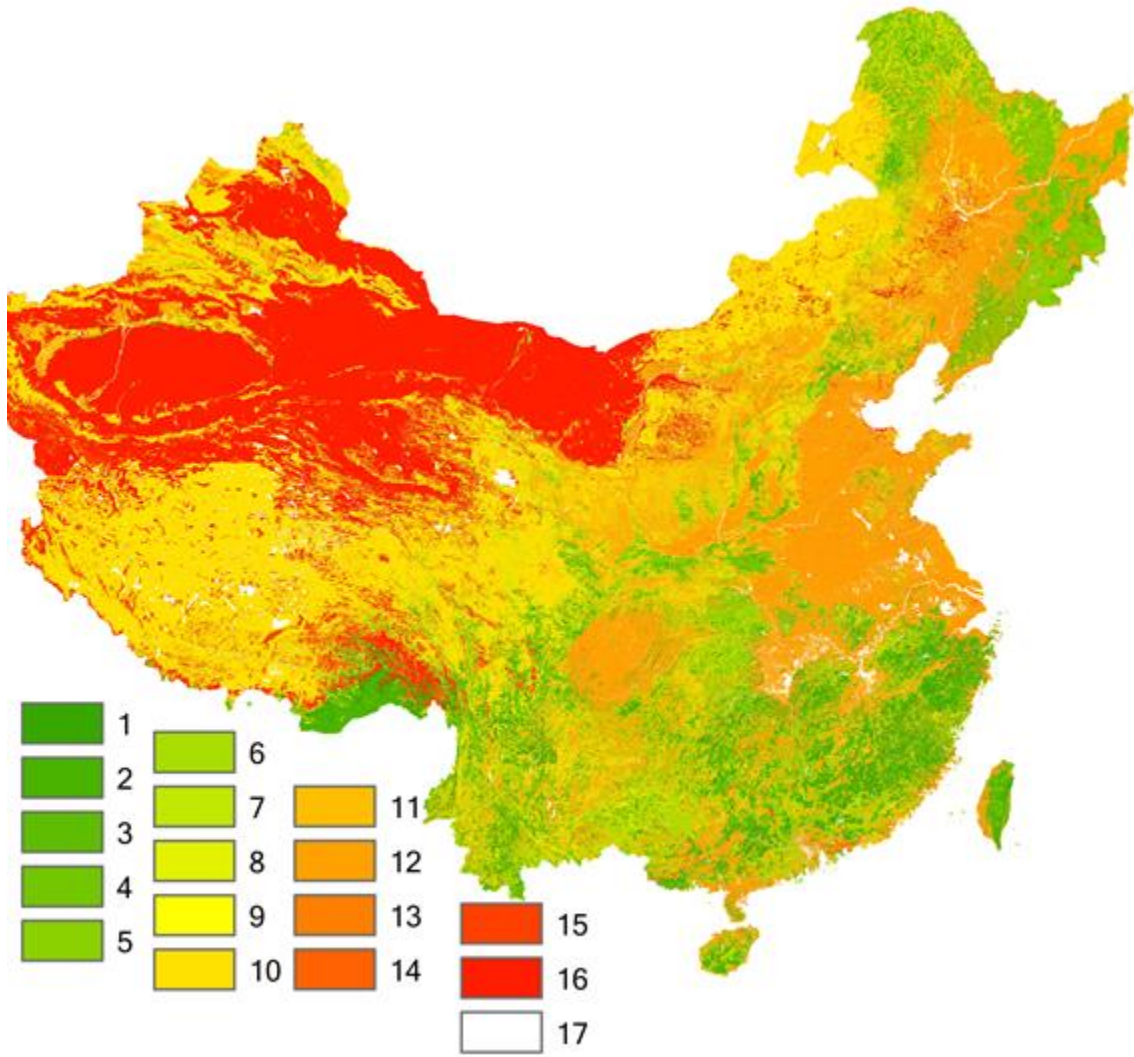

89

90 Figure S2 The spatial distribution of landuse in China. 1-17 means C1-C17.

91

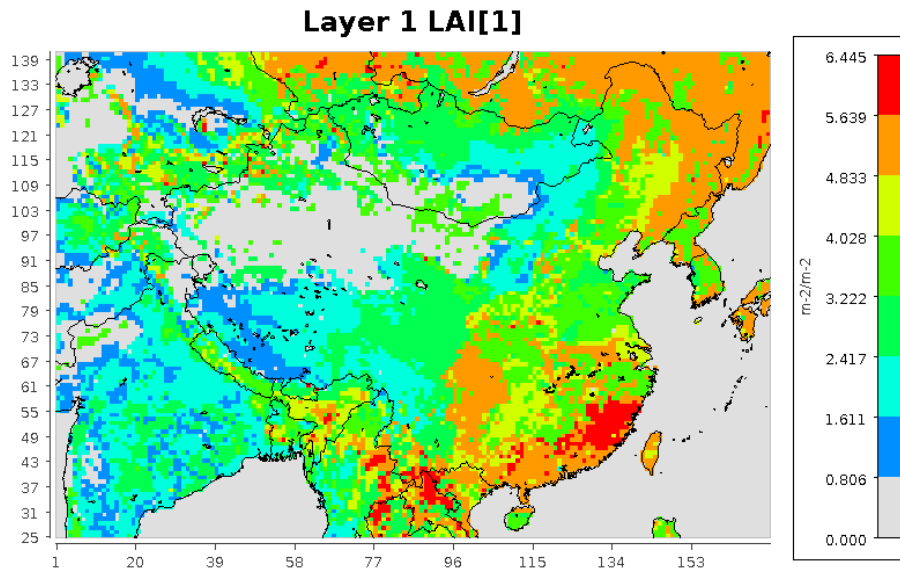

92  
 93 Figure S3 The spatial of mean LAI during summertime  
 94  
 95

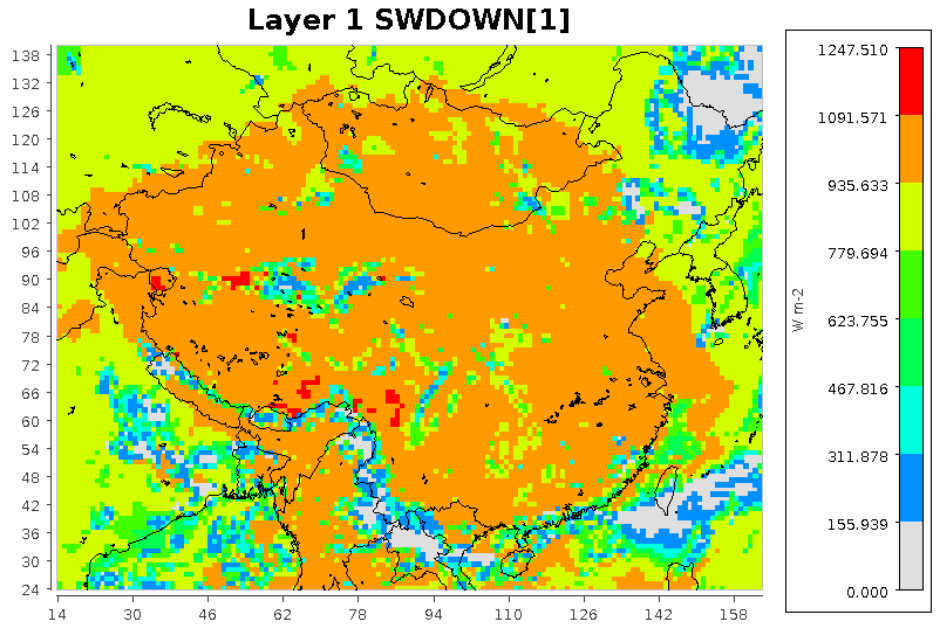

96

97 Figure S4 The spatial distribution of mean solar radiation at 14:00 during summertime.

98

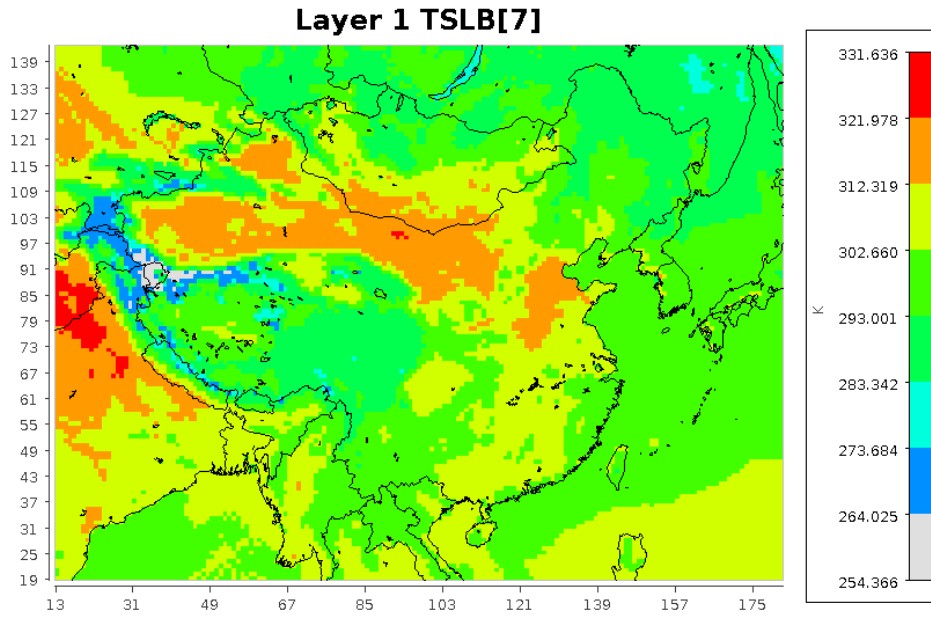

Min (40, 89) = 258.448, Max (20, 77) = 326.033

99

100 Figure S5 The spatial distribution of mean soil temperature at 14:00 during summertime.

101

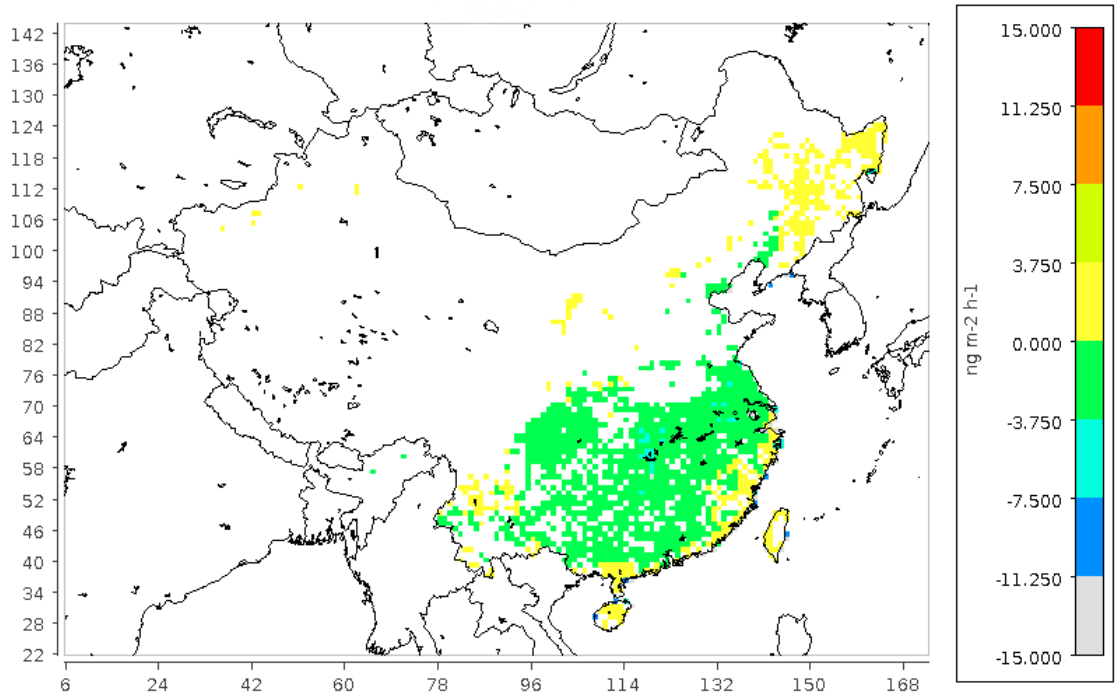

Min (115, 36) = -41.950, Max (162, 116) = 2.129

102  
103  
104

Figure S6. The simulated mean fluxes ( $\text{ng m}^{-2} \text{h}^{-1}$ ) from rice paddy during Apr-Oct.

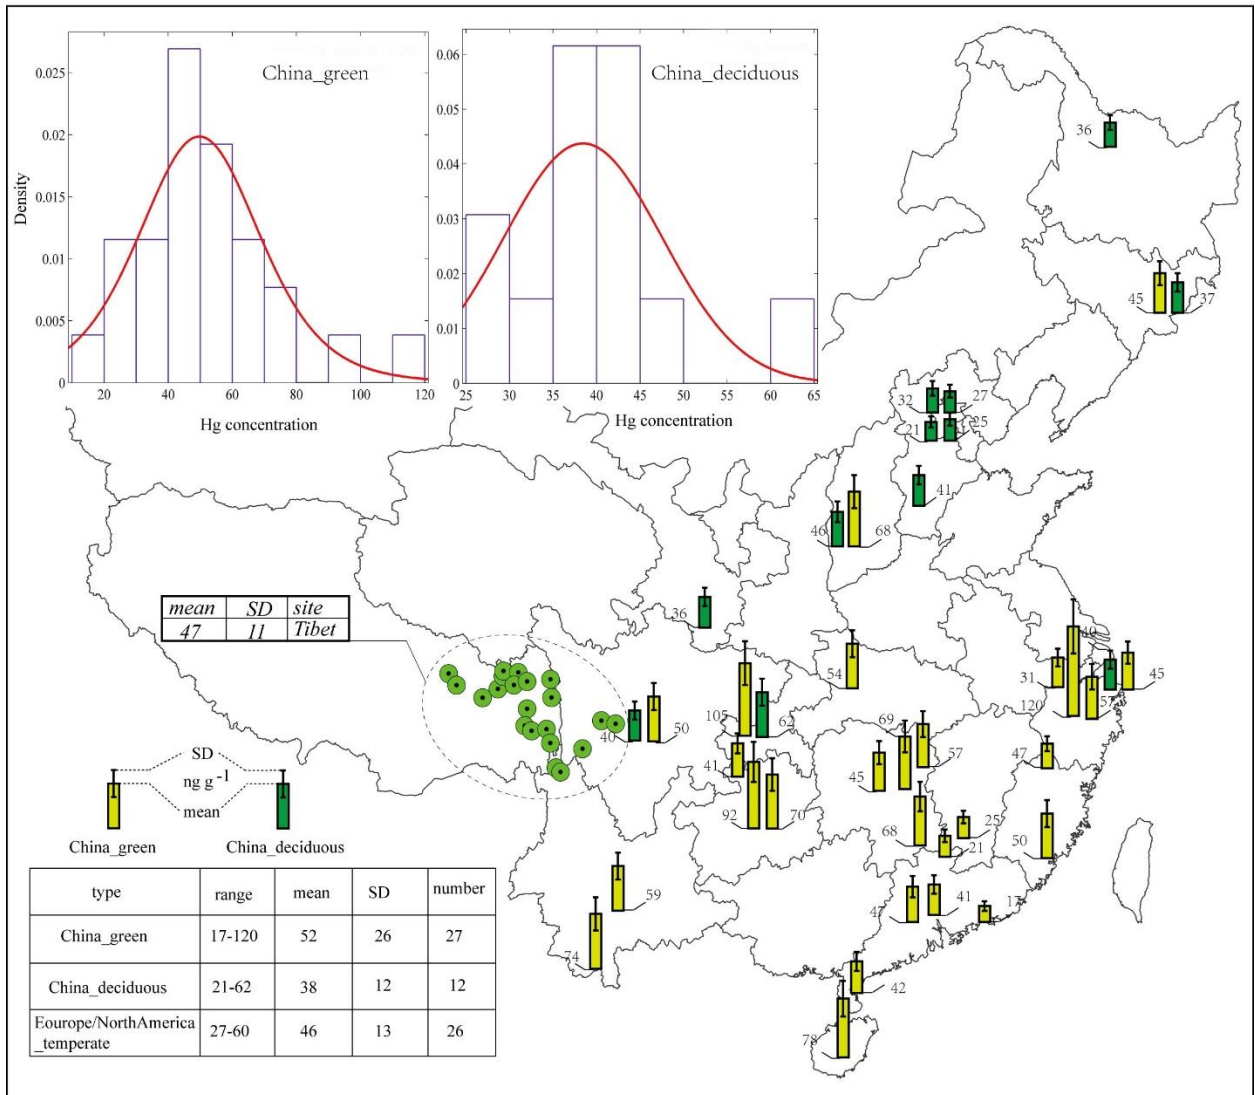

105

106 Figure S7. Database of Hg concentration in litterfall samples, China (Ma et al., 2015;Niu et al.,  
 107 2011;Zhou et al., 2013;Fu et al., 2015;Wang et al., 2014;Tang et al., 2015;Juillerat et al.,  
 108 2012;Blackwell et al., 2014;Risch et al., 2012;Selvendiran et al., 2008). An unpublished dataset  
 109 including 8 sites in China is described in details in the SI. The Hg concentrations in evergreen and  
 110 deciduous forests have a t Location-Scale distribution ( $\mu=50.1$ ,  $\sigma=19.3$ ,  $F=6.6$ ; and  $\mu=36.3$ ,  $\sigma=3.6$ ,  
 111  $F=1.4$ , respectively).

112

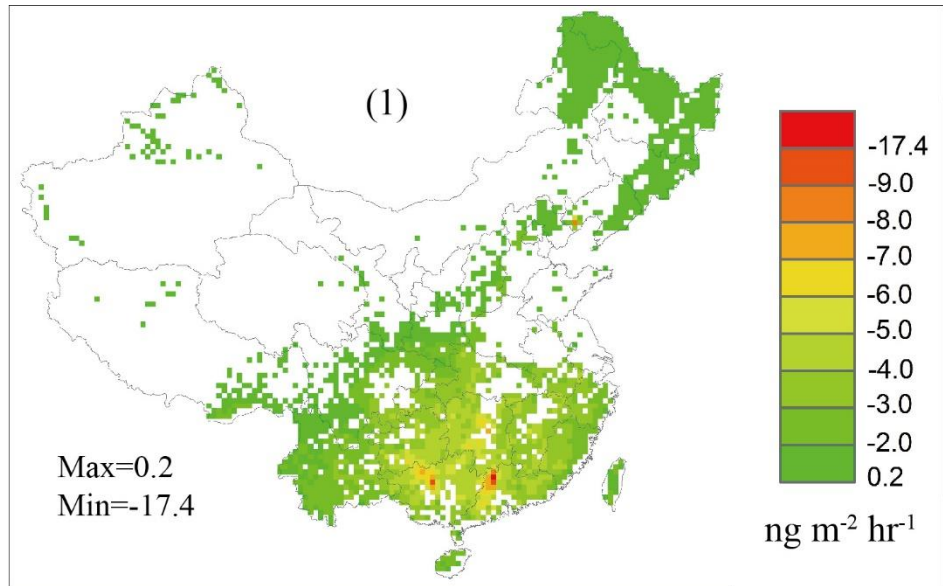

113

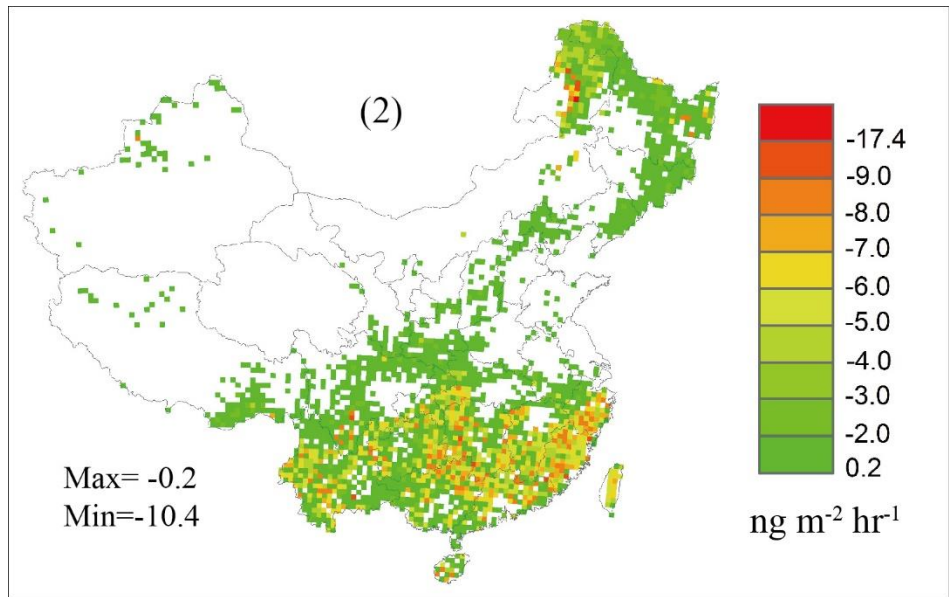

114

115 Figure S8. Comparison between: (1) the mean annual air-foliage flux in forest ecosystems predicted  
 116 by the model developed in this study; (2) the observed Hg deposition through litterfall processed  
 117 by Monte Carlo simulation (Wang et al., 2016). It is noted that the dataset size of (2) is about 5%  
 118 large than the size of (1), because (2) contains trees in ecotone between forest and other landuses.  
 119



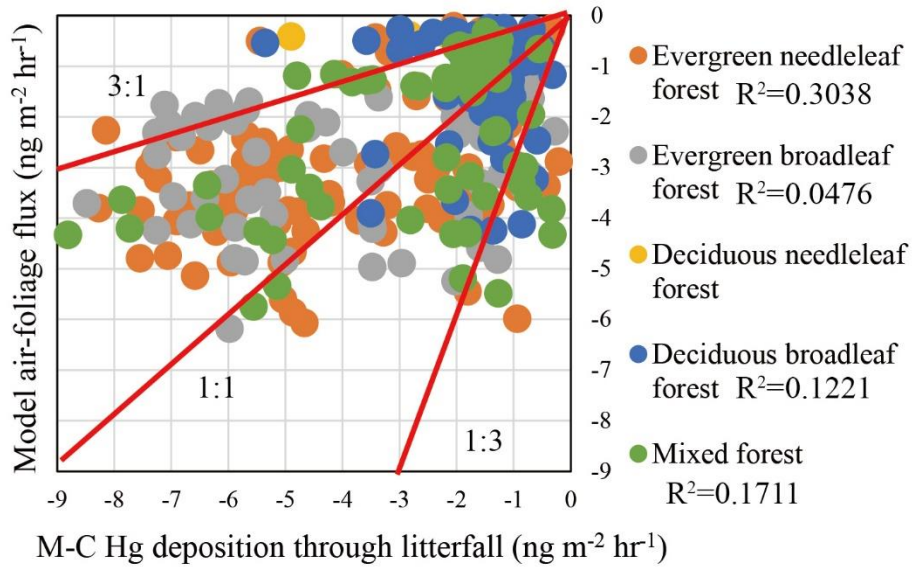

120

121 Figure S9. Scatterplot of observed Hg deposition through litterfall processed by Monte Carlo (M-

122 C) simulation and the estimate air-foilage flux predicted by the model developed in this study.

123

124

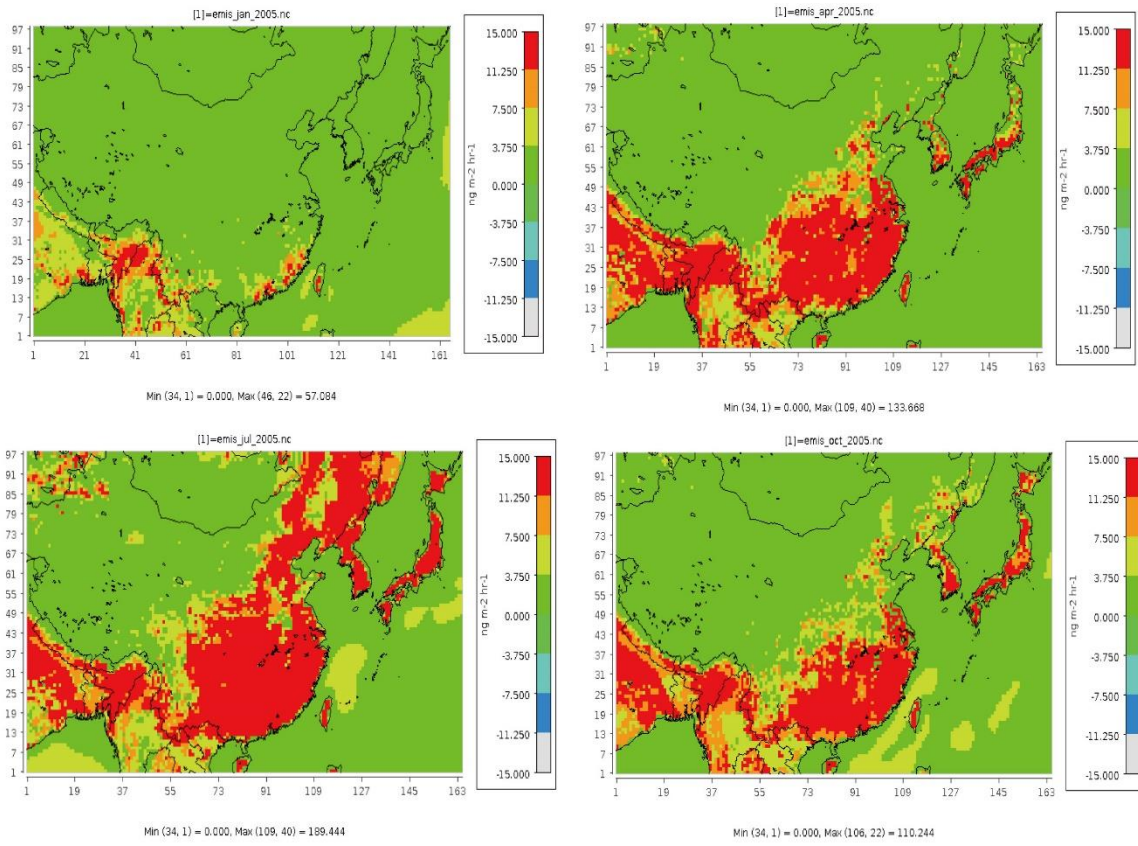

125

126 Figure S10. The simulated air-surfaces  $Hg^0$  fluxes in East Asia (Shetty et al., 2008).

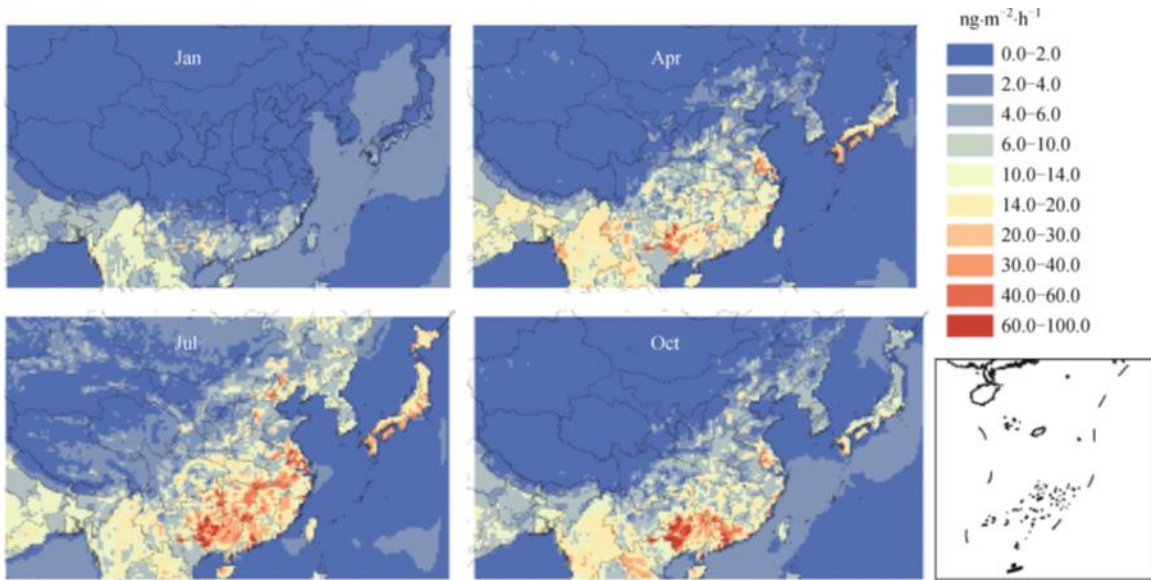

127

128 Figure S11. The simulated air-surfaces  $Hg^0$  fluxes in East Asia (Wang et al., 2014).

129 References

- 130 Blackwell, B. D., Driscoll, C. T., Maxwell, J. A., and Holsen, T. M.: Changing climate alters inputs and pathways  
131 of mercury deposition to forested ecosystems, *Biogeochemistry*, 119, 215-228, 2014.
- 132 Crowther, T. W., Glick, H. B., Covey, K. R., Bettigole, C., Maynard, D. S., Thomas, S. M., Smith, J. R., Hintler, G.,  
133 Duguid, M. C., Amatulli, G., Tuanmu, M. N., Jetz, W., Salas, C., Stam, C., Piotta, D., Tavani, R., Green, S., Bruce,  
134 G., Williams, S. J., Wiser, S. K., Huber, M. O., Hengeveld, G. M., Nabuurs, G. J., Tikhonova, E., Borchardt, P.,  
135 Li, C. F., Powrie, L. W., Fischer, M., Hemp, A., Homeier, J., Cho, P., Vibrans, A. C., Umunay, P. M., Piao, S. L.,  
136 Rowe, C. W., Ashton, M. S., Crane, P. R., and Bradford, M. A.: Mapping tree density at a global scale, *Nature*,  
137 525, 201-205, 10.1038/nature14967  
138 <http://www.nature.com/nature/journal/v525/n7568/abs/nature14967.html#supplementary-information>,  
139 2015.
- 140 Du, B. Y., Wu, Q., Luo, Y., and Duan, L.: Field measurement of soil mercury emission in a Masson pine forest  
141 in Tieshanping, Chongqing in Southwestern China, *Huan jing ke xue= Huanjing kexue / [bian ji, Zhongguo ke  
142 xue yuan huan jing ke xue wei yuan hui "Huan jing ke xue" bian ji wei yuan hui.]*, 35, 3830-3835, 2014.
- 143 Fang, F. M., Wang, Q. C., and Yin, J. H.: Mercury flux from urban soils and its potential factors (in Chinese),  
144 *Sheng Tai Huan Jing*, 3, 260-262, 2003.
- 145 Feng, X. B., Yan, H. Y., Wang, S. F., Qiu, G. L., Tang, S. L., Shang, L. H., Dai, Q. J., and Hou, Y. M.: Seasonal  
146 variation of gaseous mercury exchange rate between air and water surface over Baihua reservoir, Guizhou,  
147 China, *Atmos Environ*, 38, 4721-4732, 2004.
- 148 Feng, X. B., Wang, S. F., Qiu, G. A., Hou, Y. M., and Tang, S. L.: Total gaseous mercury emissions from soil in  
149 Guiyang, Guizhou, China, *J Geophys Res-Atmos*, 110, 2005.
- 150 Feng, X. B., Wang, S. F., Qiu, G. G., He, T. R., Li, G. H., Li, Z. G., and Shang, L. H.: Total gaseous mercury  
151 exchange between water and air during cloudy weather conditions over Hongfeng Reservoir, Guizhou, China,  
152 *J Geophys Res-Atmos*, 113, 2008.
- 153 Fu, X. W., Feng, X. B., and Wang, S. F.: Exchange fluxes of Hg between surfaces and atmosphere in the eastern  
154 flank of Mount Gongga, Sichuan province, southwestern China, *Journal of Geophysical Research-  
155 Atmospheres*, 113, 2008.
- 156 Fu, X. W., Feng, X. B., Wan, Q., Meng, B., Yan, H. Y., and Guo, Y. N.: Probing Hg evasion from surface waters  
157 of two Chinese hyper/meso-eutrophic reservoirs, *Science of the Total Environment*, 408, 5887-5896, 2010.
- 158 Fu, X. W., Feng, X. B., Zhang, H., Yu, B., and Chen, L. G.: Mercury emissions from natural surfaces highly  
159 impacted by human activities in Guangzhou province, South China, *Atmos Environ*, 54, 185-193, 2012.
- 160 Fu, X. W., Feng, X. B., Guo, Y. N., Meng, B., Yin, R. S., and Yao, H.: Distribution and production of reactive  
161 mercury and dissolved gaseous mercury in surface waters and water/air mercury flux in reservoirs on  
162 Wujiang River, Southwest China, *J Geophys Res-Atmos*, 118, 3905-3917, 2013a.
- 163 Fu, X. W., Feng, X. B., Yin, R. S., and Zhang, H.: Diurnal variations of total mercury, reactive mercury, and  
164 dissolved gaseous mercury concentrations and water/air mercury flux in warm and cold seasons from  
165 freshwaters of southwestern China, *Environ Toxicol Chem*, 32, 2256-2265, 2013b.
- 166 Fu, X. W., Zhang, H., Wang, X., Yu, B., Lin, C.-J., and Feng, X. B.: Observations of atmospheric mercury in  
167 China: a critical review, *Atmos. Chem. Phys. Discuss.*, 11925-11983, doi:10.5194/acpd-15-11925-2015, 2015.
- 168 Juillerat, J. I., Ross, D. S., and Bank, M. S.: Mercury in litterfall and upper soil horizons in forested ecosystems  
169 in Vermont, USA, *Environmental Toxicology and Chemistry*, 31, 10.1002/etc.1896, 2012.

170 Ma, M., Wang, D. Y., Sun, R. G., Shen, Y. Y., and Huang, L. X.: Gaseous mercury emissions from subtropical  
171 forested and open field soils in a national nature reserve, southwest China, *Atmos Environ*, 64, 116-123,  
172 2013.

173 Ma, M., Wang, D. Y., Du, h. X., Z, Z., and W, S. Q.: Atmospheric mercury deposition and its contribution of  
174 the regional atmospheric transport to mercury pollution at a national forest nature reserve, southwest  
175 China, *Environ Sci Pollut R*, DOI 10.1007/s11356-015-5152-9, 2015.

176 Niu, Z., Zhang, X., Wang, Z., and Ci, Z.: Mercury in leaf litter in typical suburban and urban broadleaf forests  
177 in China, *J Environ Sci-China*, 23, 2042-2048, 10.1016/s1001-0742(10)60669-9, 2011.

178 Raychaudhuri, S.: INTRODUCTION TO MONTE CARLO SIMULATION, *Proceedings of the 2008 Winter*  
179 *Simulation Conference*, 91-100, 2008.

180 Risch, M. R., DeWild, J. F., Krabbenhoft, D. P., Kolka, R. K., and Zhang, L. M.: Litterfall mercury dry deposition  
181 in the eastern USA, *Environ Pollut*, 161, 284-290, 2012.

182 Selvendiran, P., Driscoll, C. T., Montesdeoca, M. R., and Bushey, J. T.: Inputs, storage, and transport of total  
183 and methyl mercury in two temperate forest wetlands, *J Geophys Res-Bioge*, 113, 2008.

184 Shetty, S. K., Lin, C. J., Streets, D. G., and Jang, C.: Model estimate of mercury emission from natural sources  
185 in East Asia, *Atmos Environ*, 42, 8674-8685, 2008.

186 Sommar, J., Zhu, W., Shang, L. H., Feng, X. B., and Lin, C. J.: A whole-air relaxed eddy accumulation  
187 measurement system for sampling vertical vapour exchange of elemental mercury, *Tellus B*, 65, 2013.

188 Tang, R., Wang, H., Luo, J., Sun, S., Gong, Y., She, J., Chen, Y., Dandan, Y., and Zhou, J.: Spatial distribution  
189 and temporal trends of mercury and arsenic in remote timberline coniferous forests, eastern of the Tibet  
190 Plateau, China, *Environ Sci Pollut R*, 22, 11658-11668, 10.1007/s11356-015-4441-7, 2015.

191 Wang, D. Y., He, L., Shi, X. J., Wei, S. Q., and Feng, X. B.: Release flux of mercury from different environmental  
192 surfaces in Chongqing, China, *Chemosphere*, 64, 1845-1854, 2006.

193 Wang, S., Zhang, L., Wang, L., Wu, Q., Wang, F., and Hao, J.: A review of atmospheric mercury emissions,  
194 pollution and control in China, *Frontiers of Environmental Science & Engineering*, 8, 631-649,  
195 10.1007/s11783-014-0673-x, 2014.

196 Wang, S. F., Feng, X. B., Qiu, G. L., and Fu, X. W.: comparison of air/soil mercury exchange  
197 between warm and cold season in Hongfeng reservoir region, *Huan jing ke xue= Huanjing kexue*  
198 / [bian ji, Zhongguo ke xue yuan huan jing ke xue wei yuan hui "Huan jing ke xue" bian ji wei yuan hui.], 25,  
199 123-127, 2004.

200 Wang, X., Bao, Z., Lin, C.-J., Yuan, W., and Feng, X.: Assessment of global mercury deposition through litterfall,  
201 *Environ Sci Technol*, 10.1021/acs.est.5b06351, 2016.

202 Zhou, J., Feng, X. B., Liu, H. Y., Zhang, H., Fu, X. W., Bao, Z. D., Wang, X., and Zhang, Y. P.: Examination of total  
203 mercury inputs by precipitation and litterfall in a remote upland forest of Southwestern China, *Atmos*  
204 *Environ*, 81, 364-372, 2013.

205 Zhu, J., Wang, D., Liu, X., and Zhang, Y.: Mercury fluxes from air/surface interfaces in paddy field and dry  
206 land, *Applied Geochemistry*, 26, 10.1016/j.apgeochem.2010.11.025, 2011.

207 Zhu, J. S., Wang, D. Y., and Ma, M.: Mercury release flux and its influencing factors at the air-water interface  
208 in paddy field in Chongqing, China, *Chinese Sci Bull*, 58, 266-274, 2013.

209 Zhu, W., Sommar, J., Lin, C. J., and Feng, X.: Mercury vapor air-surface exchange measured by collocated  
210 micrometeorological and enclosure methods - Part I: Data comparability and method characteristics, *Atmos*

211 Chem Phys, 15, 685-702, 2015.

212
